# Supplementary material
Source: PubMed Central journal article supplement (PMC2584757)
Supplement: 0805130105_SD1.pdf [file 0805130105_SD1.pdf]

List of the amino acids and of the oligonucleotide codes used for building block 1:

| AA | Structure                                                                           | Name                                                                              | Oligonucleotide Code |   |   |   |   |   |
|----|-------------------------------------------------------------------------------------|-----------------------------------------------------------------------------------|----------------------|---|---|---|---|---|
| 1  | 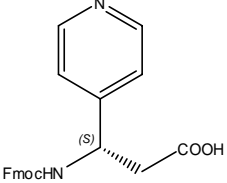   | (S)-3-(((9H-fluoren-9-yl)methoxy)carbonylamino)-3-(pyridin-4-yl)propanoic acid    | A                    | T | C | T | T | A |
| 2  |    | 3-(((9H-fluoren-9-yl)methoxy)carbonylamino)-4-(4-bromophenyl)butanoic acid        | G                    | C | T | G | C | G |
| 3  |   | (1R,2S)-2-(((9H-fluoren-9-yl)methoxy)carbonylamino)cyclopentanecarboxylic acid    | A                    | G | A | A | C | G |
| 4  |  | 3-(((9H-fluoren-9-yl)methoxy)carbonylamino)-3-(pyridin-2-yl)propanoic acid        | G                    | A | C | A | T | C |
| 5  |  | (S)-2-(((9H-fluoren-9-yl)methoxy)carbonylamino)-3-(3-fluorophenyl)propanoic acid  | A                    | T | T | A | C | T |
| 6  |  | (1S,4R)-4-(((9H-fluoren-9-yl)methoxy)carbonylamino)cyclopent-2-enecarboxylic acid | A                    | C | G | G | C | A |

|    |  |                                                                                                                 |   |   |   |   |   |   |
|----|--|-----------------------------------------------------------------------------------------------------------------|---|---|---|---|---|---|
| 7  |  | (R)-3-(4-(((9H-fluoren-9-yl)methoxy)carbonylamino)methyl)phenyl)-2-(tert-butoxycarbonylamino)propanoic acid     | A | G | A | G | A | A |
| 8  |  | Acetic acid, [[5-[[[(9H-fluoren-9-yl)methoxy]carbonyl]amino]-10,11-dihydro-5H-dibenzo[a,d]cyclohepten-2-yl]oxy] | T | C | C | A | A | A |
| 9  |  | (S)-2-(((9H-fluoren-9-yl)methoxy)carbonylamino)-3-(thiazol-4-yl)propanoic acid                                  | T | C | G | A | T | C |
| 10 |  | (S)-2-(((9H-fluoren-9-yl)methoxy)carbonylamino)-3-(1-benzyl-1H-imidazol-4-yl)propanoic acid                     | T | C | C | G | G | C |
| 11 |  | 5-(4-(((9H-fluoren-9-yl)methoxy)carbonylamino)methyl)-3,5-dimethoxyphenoxy)pentanoic acid                       | C | G | T | G | C | A |
| 12 |  | (R)-2-(((9H-fluoren-9-yl)methoxy)carbonylamino)-3-(4-chlorophenyl)propanoic acid                                | G | G | G | T | A | A |

|    |  |                                                                                     |   |   |   |   |   |   |
|----|--|-------------------------------------------------------------------------------------|---|---|---|---|---|---|
| 13 |  | (R)-3-(((9H-fluoren-9-yl)methoxy)carbonylamino)hex-5-ynoic acid                     | C | C | C | T | C | C |
| 14 |  | (S)-3-(((9H-fluoren-9-yl)methoxy)carbonylamino)-4,4-diphenylbutanoic acid           | T | C | T | C | C | A |
| 15 |  | (S)-3-(((9H-fluoren-9-yl)methoxy)carbonylamino)-2-(phenylsulfonamido)propanoic acid | C | A | A | G | C | T |
| 16 |  | (S)-3-(((9H-fluoren-9-yl)methoxy)carbonylamino)-4-(thiophen-3-yl)butanoic acid      | G | C | A | C | T | G |
| 17 |  | (S)-3-(((9H-fluoren-9-yl)methoxy)carbonylamino)-4-(4-iodophenyl)butanoic acid       | A | C | G | A | A | T |
| 18 |  | (R)-3-(((9H-fluoren-9-yl)methoxy)carbonylamino)-4-(naphthalen-2-yl)butanoic acid    | T | A | T | C | A | G |

|    |                                                                                   |                                                                                   |   |   |   |   |   |   |
|----|-----------------------------------------------------------------------------------|-----------------------------------------------------------------------------------|---|---|---|---|---|---|
| 19 | 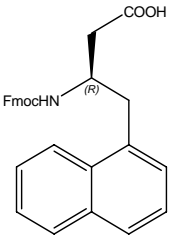 | (R)-3-(((9H-fluoren-9-yl)methoxy)carbonylamino)-4-(naphthalen-1-yl)butanoic acid  | T | G | A | A | A | T |
| 20 |  | (S)-2-(((9H-fluoren-9-yl)methoxy)carbonylamino)-3-(4-hydroxyphenyl)propanoic acid | G | T | T | A | G | T |

List of the carboxylic acids and of the oligonucleotide codes used for building block 2:

| CA | Structure                                                                           | Oligonucleotide Code |   |   |   |   |   |   |   |
|----|-------------------------------------------------------------------------------------|----------------------|---|---|---|---|---|---|---|
| 1  | 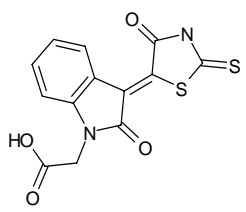   | T                    | T | T | T | T | T | T | T |
| 2  |    | G                    | G | G | G | T | T | T | T |
| 3  |    | C                    | C | C | C | T | T | T | T |
| 4  |   | A                    | A | A | A | T | T | T | T |
| 5  |  | A                    | C | G | T | G | T | T | T |
| 6  |  | C                    | A | T | G | G | T | T | T |
| 7  |  | G                    | T | A | C | G | T | T | T |

|    |                                                                                     |   |   |   |   |   |   |   |   |
|----|-------------------------------------------------------------------------------------|---|---|---|---|---|---|---|---|
| 8  | 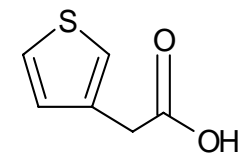   | T | G | C | A | G | T | T | T |
| 9  |    | G | A | C | T | C | T | T | T |
| 10 |    | T | C | A | G | C | T | T | T |
| 11 |    | A | G | T | C | C | T | T | T |
| 12 |   | C | T | G | A | C | T | T | T |
| 13 |  | C | G | A | T | A | T | T | T |
| 14 |  | A | T | C | G | A | T | T | T |

|    |                                                                                                                              |   |   |   |   |   |   |   |   |
|----|------------------------------------------------------------------------------------------------------------------------------|---|---|---|---|---|---|---|---|
| 15 | 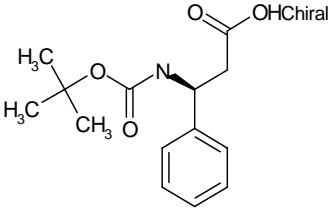 <p style="text-align: right;">Chiral</p>   | T | A | G | C | A | T | T | T |
| 16 |  <p style="text-align: right;">Chiral</p>   | G | C | T | A | A | T | T | T |
| 17 |  <p style="text-align: right;">Chiral</p>  | C | A | G | T | T | G | T | T |
| 18 |  <p style="text-align: right;">Chiral</p> | A | C | T | G | T | G | T | T |
| 19 |                                           | T | G | A | C | T | G | T | T |
| 20 |                                           | G | T | C | A | T | G | T | T |

|    |                                                                                     |   |   |   |   |   |   |   |   |
|----|-------------------------------------------------------------------------------------|---|---|---|---|---|---|---|---|
| 21 | 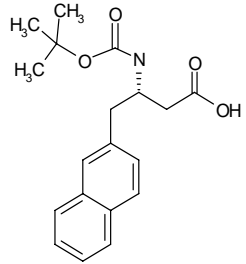   | G | G | T | T | G | G | T | T |
| 22 |    | T | T | G | G | G | G | T | T |
| 23 |   | A | A | C | C | G | G | T | T |
| 24 |  | C | C | A | A | G | G | T | T |
| 25 |  | A | T | A | T | C | G | T | T |



|    |                                                                                                 |   |   |   |   |   |   |   |   |
|----|-------------------------------------------------------------------------------------------------|---|---|---|---|---|---|---|---|
| 26 | 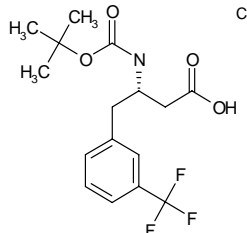 <p>Chiral</p> | C | G | C | G | C | G | T | T |
| 27 |  <p>Chiral</p> | G | C | G | C | C | G | T | T |
| 28 |  <p>Chiral</p> | T | A | T | A | C | G | T | T |
| 29 |              | T | C | C | T | A | G | T | T |
| 30 |              | G | A | A | G | A | G | T | T |
| 31 |              | C | T | T | C | A | G | T | T |

|    |                                                                                     |   |   |   |   |   |   |   |   |
|----|-------------------------------------------------------------------------------------|---|---|---|---|---|---|---|---|
| 32 | 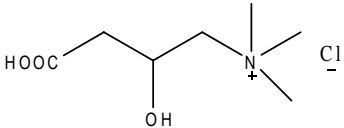   | A | G | G | A | A | G | T | T |
| 33 |    | A | G | C | T | T | C | T | T |
| 34 |    | C | T | A | G | T | C | T | T |
| 35 |  | G | A | T | C | T | C | T | T |
| 36 |  | T | C | G | A | T | C | T | T |
| 37 |  | T | A | A | T | G | C | T | T |
| 38 |  | G | C | C | G | G | C | T | T |
| 39 |  | C | G | G | C | G | C | T | T |

|           |                                                                                     |          |          |          |          |          |          |          |          |
|-----------|-------------------------------------------------------------------------------------|----------|----------|----------|----------|----------|----------|----------|----------|
|           |                                                                                     |          |          |          |          |          |          |          |          |
| <b>40</b> | 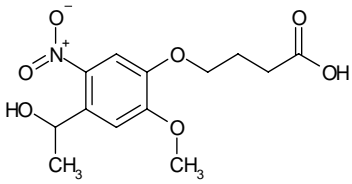   | <b>A</b> | <b>T</b> | <b>T</b> | <b>A</b> | <b>G</b> | <b>C</b> | <b>T</b> | <b>T</b> |
| <b>41</b> |    | <b>C</b> | <b>C</b> | <b>T</b> | <b>T</b> | <b>C</b> | <b>C</b> | <b>T</b> | <b>T</b> |
| <b>42</b> |   | <b>A</b> | <b>A</b> | <b>G</b> | <b>G</b> | <b>C</b> | <b>C</b> | <b>T</b> | <b>T</b> |
| <b>43</b> |  | <b>T</b> | <b>T</b> | <b>C</b> | <b>C</b> | <b>C</b> | <b>C</b> | <b>T</b> | <b>T</b> |
| <b>44</b> |  | <b>G</b> | <b>G</b> | <b>A</b> | <b>A</b> | <b>C</b> | <b>C</b> | <b>T</b> | <b>T</b> |
| <b>45</b> |  | <b>G</b> | <b>T</b> | <b>G</b> | <b>T</b> | <b>A</b> | <b>C</b> | <b>T</b> | <b>T</b> |
| <b>46</b> |  | <b>T</b> | <b>G</b> | <b>T</b> | <b>G</b> | <b>A</b> | <b>C</b> | <b>T</b> | <b>T</b> |

|    |                                                                                     |   |   |   |   |   |   |   |   |
|----|-------------------------------------------------------------------------------------|---|---|---|---|---|---|---|---|
| 47 | 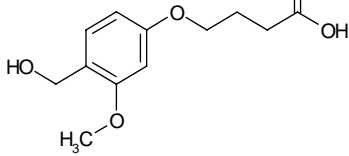   | A | C | A | C | A | C | T | T |
| 48 |    | C | A | C | A | A | C | T | T |
| 49 |    | G | C | A | T | T | A | T | T |
| 50 |   | T | A | C | G | T | A | T | T |
| 51 |  | A | T | G | C | T | A | T | T |
| 52 |  | C | G | T | A | T | A | T | T |
| 53 |  | C | T | C | T | G | A | T | T |

|    |                                                                                     |   |   |   |   |   |   |   |   |
|----|-------------------------------------------------------------------------------------|---|---|---|---|---|---|---|---|
| 54 | 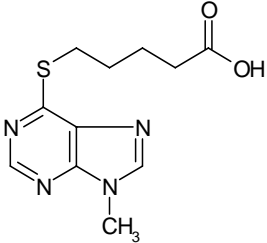   | A | G | A | G | G | A | T | T |
| 55 |    | T | C | T | C | G | A | T | T |
| 56 |    | G | A | G | A | G | A | T | T |
| 57 |   | T | G | G | T | C | A | T | T |
| 58 |  | G | T | T | G | C | A | T | T |
| 59 |  | C | A | A | C | C | A | T | T |
| 60 |  | A | C | C | A | C | A | T | T |
| 61 |  | A | A | T | T | A | A | T | T |

|    |                                                                                     |   |   |   |   |   |   |   |   |
|----|-------------------------------------------------------------------------------------|---|---|---|---|---|---|---|---|
| 62 | 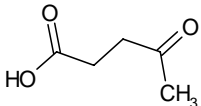   | C | C | G | G | A | A | T | T |
| 63 |    | G | G | C | C | A | A | T | T |
| 64 |    | T | T | A | A | A | A | T | T |
| 65 |    | G | G | T | T | T | T | G | G |
| 66 |   | T | T | G | G | T | T | G | G |
| 67 |  | A | A | C | C | T | T | G | G |
| 68 |  | C | C | A | A | T | T | G | G |
| 69 |  | C | A | G | T | G | T | G | G |

|    |                                                                                     |   |   |   |   |   |   |   |   |
|----|-------------------------------------------------------------------------------------|---|---|---|---|---|---|---|---|
| 70 | 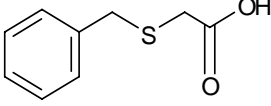   | A | C | T | G | G | T | G | G |
| 71 |    | T | G | A | C | G | T | G | G |
| 72 |    | G | T | C | A | G | T | G | G |
| 73 |    | T | C | C | T | C | T | G | G |
| 74 |   | G | A | A | G | C | T | G | G |
| 75 |  | C | T | T | C | C | T | G | G |
| 76 |  | A | G | G | A | C | T | G | G |
| 77 |  | A | T | A | T | A | T | G | G |
| 78 |  | C | G | C | G | A | T | G | G |
| 79 |  | G | C | G | C | A | T | G | G |

|    |                                                                                     |   |   |   |   |   |   |   |   |
|----|-------------------------------------------------------------------------------------|---|---|---|---|---|---|---|---|
| 80 | 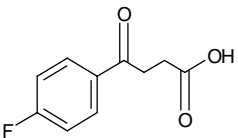   | T | A | T | A | A | T | G | G |
| 81 |    | A | C | G | T | T | G | G | G |
| 82 |    | C | A | T | G | T | G | G | G |
| 83 |    | G | T | A | C | T | G | G | G |
| 84 |   | T | G | C | A | T | G | G | G |
| 85 |  | T | T | T | T | G | G | G | G |
| 86 |  | G | G | G | G | G | G | G | G |
| 87 |  | C | C | C | C | G | G | G | G |



|    |                                                                                     |   |   |   |   |   |   |   |   |
|----|-------------------------------------------------------------------------------------|---|---|---|---|---|---|---|---|
| 88 | 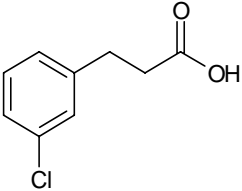   | A | A | A | A | G | G | G | G |
| 89 |    | C | G | A | T | C | G | G | G |
| 90 |    | A | T | C | G | C | G | G | G |
| 91 |   | T | A | G | C | C | G | G | G |
| 92 |  | G | C | T | A | C | G | G | G |
| 93 |  | G | A | C | T | A | G | G | G |
| 94 |  | T | C | A | G | A | G | G | G |

|     |                                                                                     |   |   |   |   |   |   |   |   |
|-----|-------------------------------------------------------------------------------------|---|---|---|---|---|---|---|---|
| 95  | 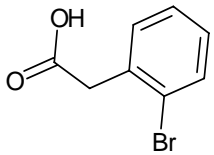   | A | G | T | C | A | G | G | G |
| 96  |    | C | T | G | A | A | G | G | G |
| 97  |    | C | T | C | T | T | C | G | G |
| 98  |    | A | G | A | G | T | C | G | G |
| 99  |   | T | C | T | C | T | C | G | G |
| 100 |  | G | A | G | A | T | C | G | G |
| 101 |  | G | C | A | T | G | C | G | G |
| 102 |  | T | A | C | G | G | C | G | G |
| 103 |  | A | T | G | C | G | C | G | G |
| 104 |  | C | G | T | A | G | C | G | G |

|     |                                                                                     |   |   |   |   |   |   |   |   |
|-----|-------------------------------------------------------------------------------------|---|---|---|---|---|---|---|---|
|     |                                                                                     |   |   |   |   |   |   |   |   |
| 105 | 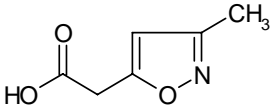   | A | A | T | T | C | C | G | G |
| 106 |    | C | C | G | G | C | C | G | G |
| 107 |    | G | G | C | C | C | C | G | G |
| 108 |   | T | T | A | A | C | C | G | G |
| 109 |  | T | G | G | T | A | C | G | G |
| 110 |  | G | T | T | G | A | C | G | G |
| 111 |  | C | A | A | C | A | C | G | G |

|     |                                                                                     |   |   |   |   |   |   |   |   |
|-----|-------------------------------------------------------------------------------------|---|---|---|---|---|---|---|---|
| 112 | 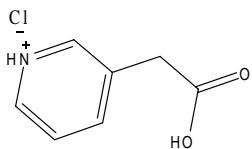   | A | C | C | A | A | C | G | G |
| 113 |    | T | A | A | T | T | A | G | G |
| 114 |    | G | C | C | G | T | A | G | G |
| 115 |   | C | G | G | C | T | A | G | G |
| 116 |  | A | T | T | A | T | A | G | G |
| 117 |  | A | G | C | T | G | A | G | G |
| 118 |  | G | A | T | C | G | A | G | G |
| 119 |  | T | C | G | A | G | A | G | G |

|     |                                                                                     |   |   |   |   |   |   |   |   |
|-----|-------------------------------------------------------------------------------------|---|---|---|---|---|---|---|---|
| 120 | 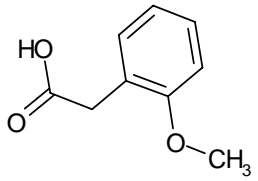   | G | T | G | T | C | A | G | G |
| 121 |    | T | G | T | G | C | A | G | G |
| 122 |    | A | C | A | C | C | A | G | G |
| 123 |    | C | A | C | A | C | A | G | G |
| 124 |   | A | A | G | G | A | A | G | G |
| 125 |  | T | T | C | C | A | A | G | G |
| 126 |  | G | G | A | A | A | A | G | G |
| 127 |  | C | C | T | T | T | T | C | C |

|     |                                                                                     |   |   |   |   |   |   |   |   |
|-----|-------------------------------------------------------------------------------------|---|---|---|---|---|---|---|---|
| 128 | 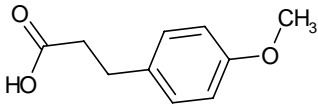   | A | A | G | G | T | T | C | C |
| 129 |    | T | T | C | C | T | T | C | C |
| 130 |    | G | T | G | T | G | T | C | C |
| 131 |   | T | G | T | G | G | T | C | C |
| 132 |  | A | C | A | C | G | T | C | C |
| 133 |  | C | A | C | A | G | T | C | C |
| 134 |  | A | G | C | T | C | T | C | C |

|     |                                                                                     |   |   |   |   |   |   |   |   |
|-----|-------------------------------------------------------------------------------------|---|---|---|---|---|---|---|---|
| 135 | 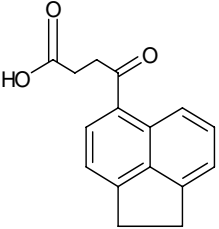   | C | T | A | G | C | T | C | C |
| 136 |    | G | A | T | C | C | T | C | C |
| 137 |    | T | C | G | A | C | T | C | C |
| 138 |  | T | A | A | T | A | T | C | C |
| 139 |  | G | C | C | G | A | T | C | C |
| 140 |  | C | G | G | C | A | T | C | C |

|     |                                                                                     |   |   |   |   |   |   |   |   |
|-----|-------------------------------------------------------------------------------------|---|---|---|---|---|---|---|---|
| 141 | 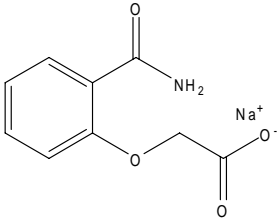   | A | T | T | A | A | T | C | C |
| 142 |    | T | G | G | T | T | G | C | C |
| 143 |    | G | T | T | G | T | G | C | C |
| 144 |  | C | A | A | C | T | G | C | C |
| 145 |  | A | C | C | A | T | G | C | C |
| 146 |  | A | A | T | T | G | G | C | C |



|     |                                                                                     |   |   |   |   |   |   |   |   |
|-----|-------------------------------------------------------------------------------------|---|---|---|---|---|---|---|---|
| 147 | 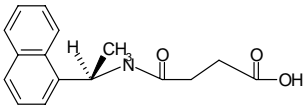   | C | C | G | G | G | G | C | C |
| 148 |    | G | G | C | C | G | G | C | C |
| 149 |    | G | C | A | T | C | G | C | C |
| 150 |  | T | A | C | G | C | G | C | C |
| 151 |  | A | T | G | C | C | G | C | C |
| 152 |  | C | G | T | A | C | G | C | C |

|     |                                                                                     |   |   |   |   |   |   |   |   |
|-----|-------------------------------------------------------------------------------------|---|---|---|---|---|---|---|---|
| 153 | 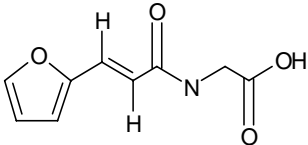   | C | T | C | T | A | G | C | C |
| 154 |    | A | G | A | G | A | G | C | C |
| 155 |    | T | C | T | C | A | G | C | C |
| 156 |  | G | A | G | A | A | G | C | C |
| 157 |  | G | A | C | T | T | C | C | C |
| 158 |  | T | C | A | G | T | C | C | C |

|     |                                                                                     |   |   |   |   |   |   |   |   |
|-----|-------------------------------------------------------------------------------------|---|---|---|---|---|---|---|---|
| 159 | 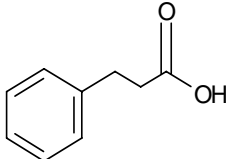   | A | G | T | C | T | C | C | C |
| 160 |    | C | T | G | A | T | C | C | C |
| 161 |    | C | G | A | T | G | C | C | C |
| 162 |  | A | T | C | G | G | C | C | C |
| 163 |  | T | A | G | C | G | C | C | C |
| 164 |  | G | C | T | A | G | C | C | C |

|     |                                                                                     |   |   |   |   |   |   |   |   |
|-----|-------------------------------------------------------------------------------------|---|---|---|---|---|---|---|---|
| 165 | 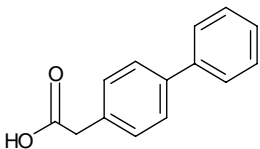   | T | T | T | T | C | C | C | C |
| 166 |    | G | G | G | G | C | C | C | C |
| 167 |    | C | C | C | C | C | C | C | C |
| 168 |  | A | A | A | A | C | C | C | C |
| 169 |  | A | C | G | T | A | C | C | C |
| 170 |  | C | A | T | G | A | C | C | C |

|     |                                                                                     |   |   |   |   |   |   |   |   |
|-----|-------------------------------------------------------------------------------------|---|---|---|---|---|---|---|---|
| 171 | 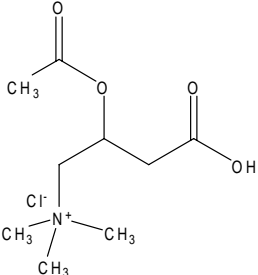   | G | T | A | C | A | C | C | C |
| 172 |    | T | G | C | A | A | C | C | C |
| 173 |    | A | T | A | T | T | A | C | C |
| 174 |  | C | G | C | G | T | A | C | C |
| 175 |  | G | C | G | C | T | A | C | C |
| 176 |  | T | A | T | A | T | A | C | C |

|     |                                                                                     |   |   |   |   |   |   |   |   |
|-----|-------------------------------------------------------------------------------------|---|---|---|---|---|---|---|---|
| 177 | 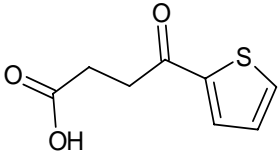   | T | C | C | T | G | A | C | C |
| 178 |    | G | A | A | G | G | A | C | C |
| 179 |    | C | T | T | C | G | A | C | C |
| 180 |  | A | G | G | A | G | A | C | C |
| 181 |  | C | A | G | T | C | A | C | C |
| 182 |  | A | C | T | G | C | A | C | C |

|     |                                                                                     |   |   |   |   |   |   |   |   |
|-----|-------------------------------------------------------------------------------------|---|---|---|---|---|---|---|---|
| 183 | 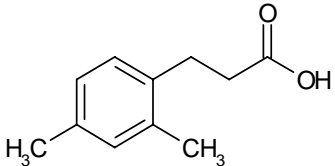   | T | G | A | C | C | A | C | C |
| 184 |    | G | T | C | A | C | A | C | C |
| 185 |    | G | G | T | T | A | A | C | C |
| 186 |  | T | T | G | G | A | A | C | C |
| 187 |  | A | A | C | C | A | A | C | C |
| 188 |  | C | C | A | A | A | A | C | C |

|     |                                                                                     |   |   |   |   |   |   |   |   |
|-----|-------------------------------------------------------------------------------------|---|---|---|---|---|---|---|---|
| 189 | 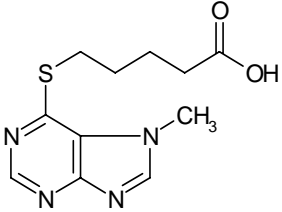   | A | A | T | T | T | T | A | A |
| 190 |    | C | C | G | G | T | T | A | A |
| 191 |    | T | T | A | A | T | T | A | A |
| 192 |  | T | G | G | T | G | T | A | A |
| 193 |  | G | T | T | G | G | T | A | A |
| 194 |  | C | A | A | C | G | T | A | A |
